# Supplementary material for: Inflammatory Myofibroblastic Tumor of the Upper Airways Harboring a New TRAF3-ALK Fusion Transcript
Source: MDPI journal article supplement (doi:10.3390/children8060505), 2021-06-15
Supplement: s1 [file s1]

## Supplementary Materials

**Table S1. Cases of Children with IMT of the Upper Airway in the Literature.**

| <i>References<br/>(year)</i>             | <i>Patient<br/>(gender and<br/>age)</i> | <i>Localization</i> | <i>Hystological<br/>assessment</i>                                                                                                 | <i>Immuno<br/>Isto<br/>chemistry</i> | <i>Treatment</i>                             | <i>Follow-up<br/>(time)</i> |
|------------------------------------------|-----------------------------------------|---------------------|------------------------------------------------------------------------------------------------------------------------------------|--------------------------------------|----------------------------------------------|-----------------------------|
| <i>Zapatero et al(1989)<sup>11</sup></i> | M, 6 y                                  | Endotracheal        | Inflammatory pleomorphic cellular proliferation with intermixed lymphocytes, plasma cells, fibroblasts, and capillary neoformation | NR                                   | Surgical resection                           | CR (8 y)                    |
| <i>Aijaz et al(1994)<sup>12</sup></i>    | M, 8 y                                  | Endotracheal        | Spindle cells with plasma cells, histiocytes, foamy macrophages, neutrophils, and some eosinophils                                 | Vimentin +, desmine focal +, ALK NR  | Surgical resection                           | CR (NR)                     |
| <i>Storck et al (1995)<sup>13</sup></i>  | F, 16 y                                 | Right main bronchus | Spindle cells with an inflammatory cell infiltrate                                                                                 | NR                                   | Sleeve resection                             | CR (8 y)                    |
| <i>Denwar et al(1997)<sup>14</sup></i>   | M, 10 m                                 | Endotracheal        | Proliferation of spindle cells (myoblasts and fibroblasts) and inflammatory cell infiltrate                                        | NR                                   | Surgical resection                           | NR                          |
| <i>Bumber et al(2001)<sup>15</sup></i>   | M, 14 y                                 | Endotracheal        | Areas of spindle cells sparkled with inflammatory cells                                                                            | Vimentin ++, SMA +/-, ALK NR         | Surgical resection and CO <sub>2</sub> laser | CR (1 y)                    |

|                                           |         |                               |                                                                                                                      |                                  |                                                |                                               |
|-------------------------------------------|---------|-------------------------------|----------------------------------------------------------------------------------------------------------------------|----------------------------------|------------------------------------------------|-----------------------------------------------|
| <i>Chan et al(2003)<sup>16</sup></i>      | F, 7 y  | Right main bronchus           | Fibrous tissue with areas of necrosis, lymphocytic infiltration, and plasma cells                                    | NR                               | Biopsy and COX2-Inhibitor                      | CR (8 m)                                      |
| <i>Hoseok et al(2005)<sup>17</sup></i>    | M, 4 y  | Carina and left main bronchus | Proliferation of spindle-shaped fibroblasts and myofibroblasts arrayed in fascicles with some storiform architecture | SMA +, vimentin +, ALK NR        | Surgical resection with carinal reconstruction | CR (3 m)                                      |
| <i>Sinvadan et al(2007)<sup>18</sup></i>  | F, 9 y  | Endotracheal                  | Sprinkling lymphocytes and spindle cells                                                                             | SMA, vimentine +; ALK NR         | Surgical resection                             | CR (NR); tracheostomy for subglottic stenosis |
| <i>Venizelos et al(2008)<sup>19</sup></i> | M, 13 y | Endotracheal                  | Spindle-shaped cells with ovoid nuclei, sparse chromatin, and eosinophilic cytoplasm                                 | Vimentine and ALK +              | Surgical resection                             | CR (6 m)                                      |
| <i>Breen et al(2008)<sup>20</sup></i>     | F, 11 y | Left main bronchus            | Fusiform components, inflammatory cells, and bronchial gland                                                         | NR                               | Surgical resection                             | CR (3 y)                                      |
| <i>Lizarbe et al(2009)<sup>21</sup></i>   | M, 8 y  | Paratracheal                  | Myxoid areas with fibroblast cells, epithelioid cells, and histiocytes mixed with inflammatory cells                 | Vimentine +, desmina, SMA, ALK - | Surgical resection                             | PD                                            |

NR: Not Reported. CR: Complete Remission

|                                            |         |                    |                                                                        |                                                      |                                                      |                |
|--------------------------------------------|---------|--------------------|------------------------------------------------------------------------|------------------------------------------------------|------------------------------------------------------|----------------|
| <i>Ochs et al(2010)</i> <sup>22</sup>      | F, 5 y  | Left main bronchus | Spindle cells with a palisading pattern (arrow) and admixed leukocytes | NR                                                   | Endobronchial resection                              | CR (3 y)       |
| <i>Sacco et al (2010)</i> <sup>23</sup>    | F, 6 y  | Paratracheal       | Spindle cells surrounded by a collagenous stroma                       | Vimentin +, SMA + (focal), EMA + Clusterin +/- ALK - | Subtotal resection + low-dose CT (vinblastine + MTX) | PR (16 months) |
| <i>Brodie et al (2011)</i> <sup>24</sup>   | F, 11 y | Endotracheal       | Spindle cells with inflammatory background                             | ALK -                                                | Surgery of the bulk mass and laser                   | CR (2 y)       |
|                                            | F, 15 y | Left main bronchus | EMA +, dense spindle cell proliferation                                | ALK +                                                | Sleeve resection of the left mainstem bronchus       | CR (3 y)       |
| <i>El-Desoky et al(2013)</i> <sup>25</sup> | F, 9 y  | Left main bronchus | Spindle cells with mild atypia                                         | EMA+, Vimentina +, SMA+ ALK NR                       | Left lobe Lobectomy                                  | CR (NR)        |
